# Supplementary material for: Nuanced role for dendritic cell intrinsic IRE1 RNase in the regulation of antitumor adaptive immunity
Source: bioRxiv or medRxiv preprint supplement (doi:10.1101/2022.07.20.500838), 2022-07-25

## Supplementary Files

# **Nuanced role for dendritic cell intrinsic IRE1 RNase in the regulation of antitumor adaptive immunity**

Felipe Flores-Santibañez<sup>1,8,9</sup>, Sofie Rennen<sup>2,3,9</sup>, Dominique Fernandez<sup>1</sup>, Clint De Nolf<sup>2</sup>, Sandra Gaete<sup>1</sup>, Camila Fuentes<sup>4</sup>, Carolina Moreno<sup>1</sup>, Diego Figueroa<sup>5</sup>, Álvaro Lladser<sup>5,6</sup>, Takao Iwawaki<sup>7</sup>, María Rosa Bono<sup>8</sup>, Sophie Janssens<sup>2,3,\*</sup> and Fabiola Osorio<sup>1,\*</sup>

This file contains:

- One supplementary reagents and tools table
- Supplementary Figures 1-6.

## Reagents and Tools table

| REAGENT or RESOURCE   | SOURCE                   | IDENTIFIER                                     |
|-----------------------|--------------------------|------------------------------------------------|
| Antibodies            |                          |                                                |
| B220 BV510            | Biolegend                | clone RA3-6B2; #cat 103222; RRID:AB_313005     |
| B220 PE-Cy5           | Biolegend                | clone RA3-6B2; #cat 103209; RRID:AB_312994     |
| CD11b BV785           | Biolegend                | clone M1/70; #cat 101243; RRID:AB_2561373      |
| CD11c APC             | Thermo Fisher Scientific | clone N418; #cat 17-0114-82; RRID:AB_469346    |
| CD11c BV711           | Biolegend                | clone N418; #cat 117349; RRID:AB_2563905       |
| CD16/32 (FcBlock) -   | Biolegend                | clone 93; #cat 101302; RRID:AB_312801          |
| CD18 PE               | BD Biosciences           | clone C71/16; #cat 553293; RRID:AB_394762      |
| CD19 BUV737           | BD Biosciences           | clone 1D3; #cat 564296; RRID:AB_2716855        |
| CD25 PE               | Tonbo Bioscience         | clone PC61.5; #cat 50-0251; RRID:AB_2621757    |
| CD26 PE-Cy7           | Biolegend                | clone H194-112; #cat 137809; RRID:AB_2564311   |
| CD274 (PD-L1) PE      | Thermo Fisher Scientific | clone MIH5; #cat 12-5982-82; RRID:AB_466089    |
| CD3 BV711             | Biolegend                | clone 17A2; #cat 100241; RRID:AB_2563945       |
| CD39 SuperBright600   | Thermo Fisher Scientific | clone 24DMS1; #cat 63-0391-82; RRID:AB_2717037 |
| CD3 $\epsilon$ BV510  | Biolegend                | clone 145-2C11; #cat 100353; RRID:AB_2565879   |
| CD3 $\epsilon$ PE-Cy5 | Biolegend                | clone 145-2C11; #cat 100309; RRID:AB_312674    |
| CD4 APC-Cy7           | Tonbo Bioscience         | clone GK1.5; #cat 25-0041; RRID:AB_2904484     |
| CD4 PE/Dazzle 594     | Biolegend                | clone GK1.5; #cat 100455; RRID:AB_2565844      |

|                         |                          |                                                |
|-------------------------|--------------------------|------------------------------------------------|
| CD40 APC                | Biolegend                | clone 3/23.; #cat 124611; RRID:AB_1134081      |
| CD44 PerCP              | Biolegend                | clone IM7; #cat 103036; RRID:AB_10645506       |
| CD44 FITC               | Biolegend                | clone IM7; #cat 103006; RRID:AB_312957         |
| CD45 BV785              | Biolegend                | clone 30-F11 ; #cat 103149; RRID:AB_2564590    |
| CD45 Alexa Fluor 700    | Biolegend                | clone 30-F11; #cat 103127; RRID:AB_493714      |
| CD45 BUV395             | BD Biosciences           | clone 30-F11; #cat 564279; RRID:AB_2651134     |
| CD45 BV650              | Biolegend                | clone 30-F11; #cat 103151; RRID:AB_2565884     |
| CD45.1 APC-Cy7          | Biolegend                | clone A20; #cat 110715; RRID:AB_313504         |
| CD62L PE-Cy7            | Biolegend                | clone MEL-14 ; #cat 104418; RRID:AB_313103     |
| CD64 BV711              | Biolegend                | clone X54-5/7.1 ; #cat 139311; RRID:AB_2563846 |
| CD64 PE/Dazzle 594      | Biolegend                | clone X54-5/7.1; #cat 139319; RRID:AB_2566558  |
| CD64 PerCP-Cy5.5        | Biolegend                | clone X54-5/7.1; #cat 139307; RRID:AB_2561962  |
| CD8a APC-Cy7            | Tonbo Bioscience         | clone 53-6.7; #cat 25-0081; RRID:AB_2621623    |
| CD8a BV650              | Biolegend                | clone 53-6.7; #cat 100742; RRID:AB_2563056     |
| CD8a eFluor 450         | Thermo Fisher Scientific | clone 53-6.7; #cat 48-0081-80; RRID:AB_1272235 |
| F4/80 Biotin            | Biolegend                | clone BM8; #cat 123105; RRID:AB_893499         |
| FOXP3 PE-Cy7            | Thermo Fisher Scientific | clone FJK-16s; #cat 25-5773-82; RRID:AB_891552 |
| Granzyme B PE Texas RED | Thermo Fisher Scientific | clone GB11; #cat GRB17; RRID:AB_2536540        |

|                                                      |                          |                                                        |
|------------------------------------------------------|--------------------------|--------------------------------------------------------|
| I-A/I-E (MHC-II) APC-Cy7                             | Biolegend                | clone M5/114.15.2;<br>#cat 107627;<br>RRID:AB_1659252  |
| IFN- $\gamma$ PE                                     | Thermo Fisher Scientific | clone XMG1.2; #cat 12-7311-82;<br>RRID:AB_466193       |
| IL-12p40 eFluor660                                   | Thermo Fisher Scientific | clone C17.8; #cat 50-7123-80;<br>RRID:AB_11218284      |
| IL-2 PE-Cy7                                          | Thermo Fisher Scientific | clone JES6-5H4;<br>#cat 25-7021-82;<br>RRID:AB_1235004 |
| Ly6C BV605                                           | Biolegend                | clone HK1.4; #cat 128035;<br>RRID:AB_2562352           |
| Ly6G Alexa Fluor 700                                 | Biolegend                | clone 1A8; #cat 127622;<br>RRID:AB_10643269            |
| NK1.1 PerCP-Cy5.5                                    | Biolegend                | clone PK136; #cat 108727;<br>RRID:AB_2132706           |
| PD1 PE                                               | Biolegend                | clone 29F.1A12;<br>#cat 135206;<br>RRID:AB_1877231     |
| PD1 BV421                                            | Biolegend                | clone 29F.1A12;<br>#cat 135217;<br>RRID:AB_10900085    |
| TCF1 Alexa Fluor 488                                 | Cell Signaling           | clone C63D9; #cat CS.6444S;<br>RRID:AB_2797627         |
| TIM3 PECy7                                           | Biolegend                | clone RMT3-23; #cat 119716;<br>RRID:AB_2571933         |
| TNF- $\alpha$ APC                                    | Biolegend                | clone MP6-XT22;<br>#cat 506307;<br>RRID:AB_315428      |
| TOX APC                                              | Miltenyi Biotec          | clone REA473; #cat 130-118-335;<br>RRID:AB_2751485     |
| XCR1 BV650                                           | Biolegend                | clone ZET; #cat 148220;<br>RRID:AB_2566410             |
| XCR1 PE                                              | Biolegend                | clone ZET; #cat 148204;<br>RRID:AB_2563843             |
| <b>Bacterial and virus strains</b>                   |                          |                                                        |
|                                                      |                          |                                                        |
| <b>Biological samples</b>                            |                          |                                                        |
| Mouse tumor draining lymph nodes (inguinal)          | This paper               | N/A                                                    |
| Mouse tumor                                          | This paper               | N/A                                                    |
| Mouse spleen                                         | This paper               | N/A                                                    |
| <b>Chemicals, peptides, and recombinant proteins</b> |                          |                                                        |
| Brefeldin A                                          | Cayman Chemical          | #cat 11861                                             |
| PMA                                                  | Sigma                    | #cat P8139                                             |



|                                                               |                                     |                                                                                                                 |
|---------------------------------------------------------------|-------------------------------------|-----------------------------------------------------------------------------------------------------------------|
| Ionomycin                                                     | Sigma                               | #cat I0634                                                                                                      |
| Critical commercial assays                                    |                                     |                                                                                                                 |
| CD45 MicroBeads, mouse                                        | Miltenyi                            | RRID:AB_2877061                                                                                                 |
| CD8a+ T Cell Isolation Kit, mouse                             | Miltenyi                            | #cat 130-104-075                                                                                                |
| LS columns                                                    | Miltenyi                            | #cat 130-042-401                                                                                                |
| BD Cytofix/Cytoperm with GolgiPlug                            | BD Biosciences                      | RRID:AB_2869013                                                                                                 |
| Foxp3 / Transcription Factor Staining Buffer Set              | eBioscience                         | #cat 00-5523-00                                                                                                 |
| RNeasy Plus Micro Kit                                         | Qiagen                              | #cat 74034                                                                                                      |
| M-MLV Reverse Transcriptase                                   | Invitrogen                          | #cat 28025-013                                                                                                  |
| iTAg Tetramer/PE - H-2 Kb OVA (SIINF EK L)                    | MBL                                 | #cat T03000                                                                                                     |
| CellTrace™ Violet Cell Proliferation Kit                      | Thermo Fisher Scientific            | #cat C34557                                                                                                     |
| Deposited data                                                |                                     |                                                                                                                 |
| RNA-seq data                                                  | This paper                          | GEO: GSE195439                                                                                                  |
| Experimental models: Cell lines                               |                                     |                                                                                                                 |
| B16-F10                                                       | ATCC                                | RRID:CVCL_0159                                                                                                  |
| B16-FLT3L                                                     | (Guo-Ping <i>et al.</i> , 1999)     | N/A                                                                                                             |
| B78-ChOVA                                                     | (Broz <i>et al.</i> , 2014)         | N/A                                                                                                             |
| OP9-DL1                                                       | (Schmitt and Zúñiga-Pflücker, 2002) | RRID:CVCL_B218                                                                                                  |
| Experimental models: Organisms/strains                        |                                     |                                                                                                                 |
| ERAI: C57BL/6J-Tg(CAG-XBP1*/venus)#Miur/MiurRbrc              | (Iwawaki <i>et al.</i> , 2004)      | RRID:IMSR_RBRC01099                                                                                             |
| CD11c-Cre: B6.Cg-Tg(Itgax-cre)1-1Reiz/J                       | The Jackson Laboratory              | RRID:IMSR_JAX:008068                                                                                            |
| IRE1 fl/fl: B6;129S4-Ern1<tm2.1Tiw>                           | (Iwawaki <i>et al.</i> , 2009)      | RRID:IMSR_RBRC05515                                                                                             |
| XBP1 fl/fl: Xbp1tm2Glm                                        | (Lee <i>et al.</i> , 2008)          | RRID:MGI:6273536                                                                                                |
| Pmel-1: B6.Cg-Thy1a/Cy Tg(TcraTcrb)8Rest/J                    | The Jackson Laboratory              | RRID:IMSR_JAX:005023                                                                                            |
| Oligonucleotides                                              |                                     |                                                                                                                 |
| Primer: Splicing assay Xbp1 Forward: ACACGCTTGGGAATGGACAC     | (Osorio <i>et al.</i> , 2014)       | N/A                                                                                                             |
| Primer: Splicing assay Xbp1 Reverse: CCATGGGAAGATGTTCTGGG     | (Osorio <i>et al.</i> , 2014)       | N/A                                                                                                             |
| Primer: Actb Forward (Fig 1G): CTAAGGCCAACCGTGAAAAG           | This Paper                          | N/A                                                                                                             |
| Primer: Actb Reverse (Fig 1G): TTGCTGATCCACATCTGCTG           | This Paper                          | N/A                                                                                                             |
| Primer: Actb Forward (Fig 4B and S5A): GTGACGTTGACATCCGTAAAGA | This Paper                          | N/A                                                                                                             |
| Primer: Actb Reverse (Fig 4B and S5A): GCCGGACTCATCGTACTCC    | This Paper                          | N/A                                                                                                             |
| Recombinant DNA                                               |                                     |                                                                                                                 |
|                                                               |                                     |                                                                                                                 |
| Software and algorithms                                       |                                     |                                                                                                                 |
| FlowJo™ Software v10                                          | BD Biosciences                      | <a href="https://www.flowjo.com/solutions/flowjo">https://www.flowjo.com/solutions/flowjo</a> ; RRID:SCR_008520 |

|                                   |                                           |                                                                                                                                               |
|-----------------------------------|-------------------------------------------|-----------------------------------------------------------------------------------------------------------------------------------------------|
| GraphPad Prism v9                 | GraphPad                                  | <a href="https://www.graphpad.com/">https://www.graphpad.com/</a> ;<br>RRID:SCR_002798                                                        |
| Trimmomatic v0.39                 | Usadellab                                 | RRID:SCR_011848                                                                                                                               |
| FastQC v0.11.8                    | Babraham<br>Bioinformatics                | RRID:SCR_014583                                                                                                                               |
| STAR v2.7.3a                      | STAR                                      | RRID:SCR_004463                                                                                                                               |
| HTSeqCount v0.11.2                | HTSeq                                     | RRID:SCR_005514                                                                                                                               |
| R Studio v2021.09.0 Build 351     | R Studio                                  | <a href="https://rstudio.com/">https://rstudio.com/</a> ;<br>RRID:SCR_000432                                                                  |
| R v4.1.1                          | R Core Team (2020)                        | <a href="http://www.r-project.org/">http://www.r-project.org/</a> ;<br>RRID:SCR_001905                                                        |
| R package: CytoML v2.4.0          | (Finak, Jiang and<br>Gottardo, 2018)      | <a href="https://bioconductor.org/packages/release/bioc/html/CytoML.html">https://bioconductor.org/packages/release/bioc/html/CytoML.html</a> |
| R package: FlowWorkspace v4.4.0   | (Finak and Jiang,<br>2021)                | RRID:SCR_001155                                                                                                                               |
| R package: FlowCore v2.4.0        | (Ellis <i>et al.</i> , 2021)              | RRID:SCR_002205                                                                                                                               |
| R package: Rtsne v0.15            | (Krijthe, 2015)                           | RRID:SCR_016342                                                                                                                               |
| R package: DBSCAN v1.1.8          | (Hahsler, Piekenbrock<br>and Doran, 2019) | <a href="https://cran.r-project.org/web/packages/dbscan/index.html">https://cran.r-project.org/web/packages/dbscan/index.html</a>             |
| R package: Limma v3.42.2          | (Ritchie <i>et al.</i> , 2015)            | RRID:SCR_010943                                                                                                                               |
| R package: EdgeR v3.28.0          | (Robinson, McCarthy<br>and Smyth, 2010)   | RRID:SCR_012802                                                                                                                               |
| R package: pheatmap v1.0.12       | (Kolde, 2019)                             | RRID:SCR_016418                                                                                                                               |
| R package: ggplot2 v3.3.5         | (Wickham, 2016)                           | RRID:SCR_014601                                                                                                                               |
| R package: ClusterProfiler v4.0.5 | (Wu <i>et al.</i> , 2021)                 | RRID:SCR_016884                                                                                                                               |
| Other                             |                                           |                                                                                                                                               |
|                                   |                                           |                                                                                                                                               |

# Supplementary Figure 1

A

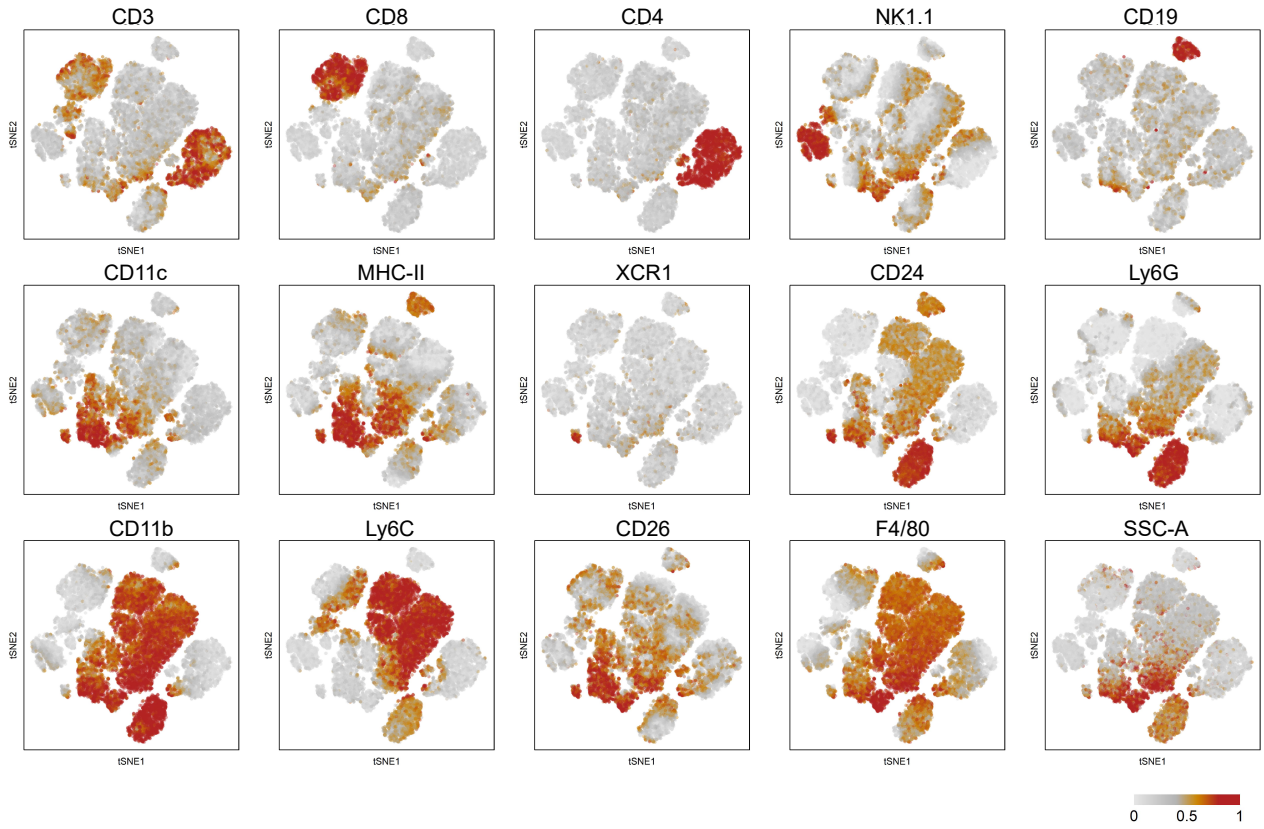

B

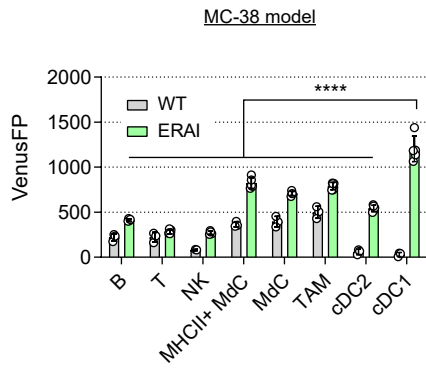

C

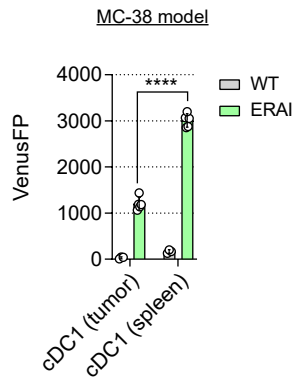

# Supplementary Figure 2

A

## Tumor gating

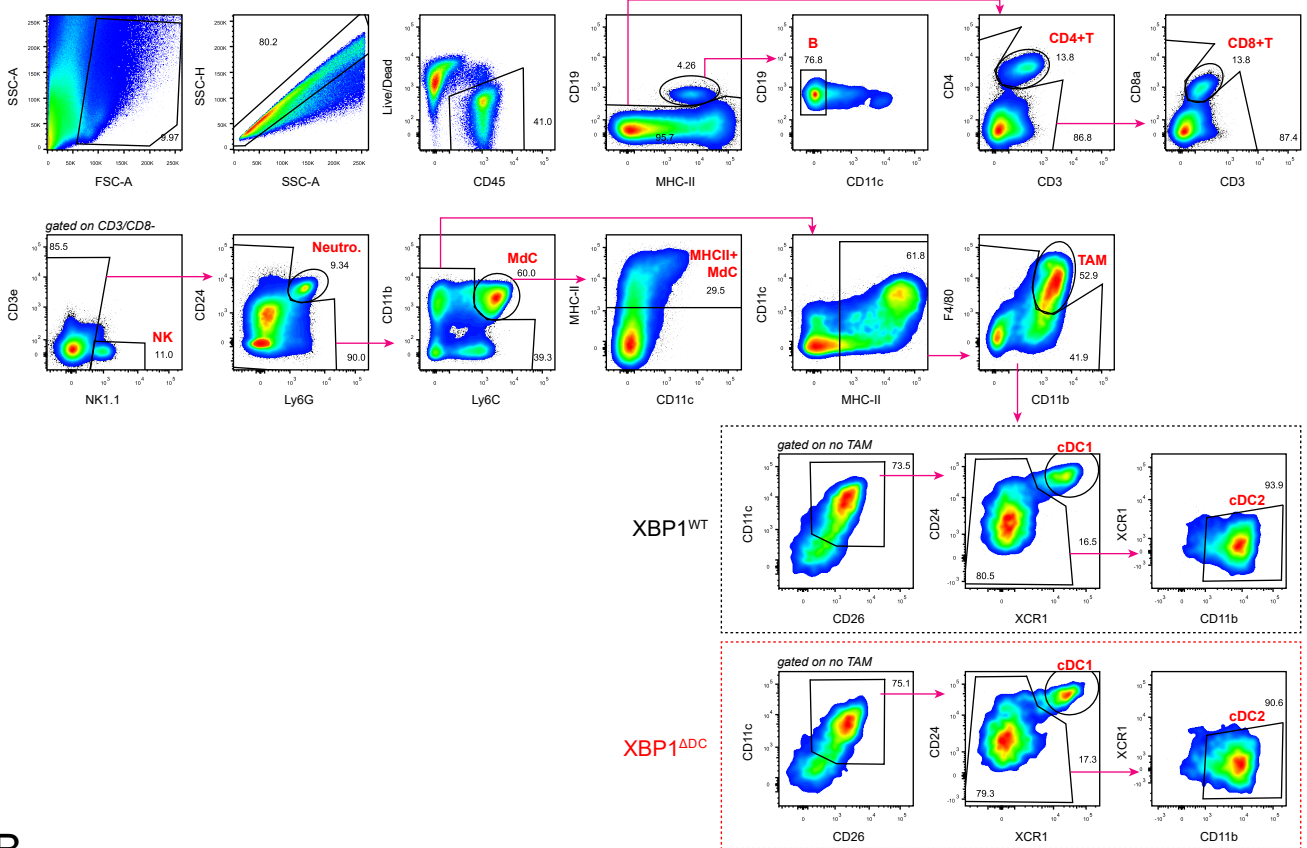

B

## Tumor draining lymph node gating

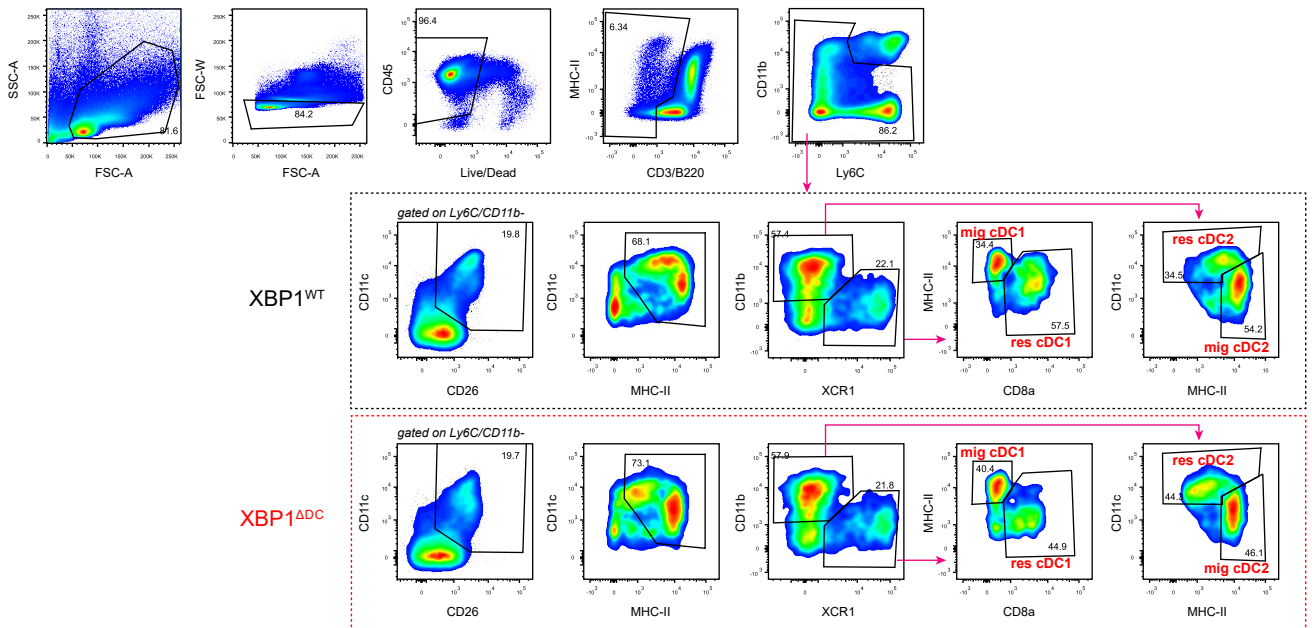

# Supplementary Figure 3

A

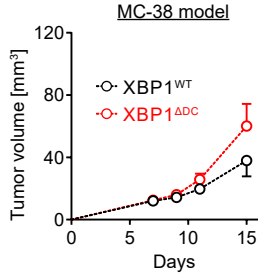

B

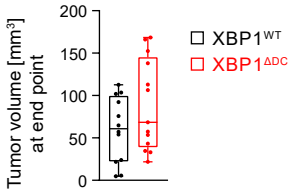

C

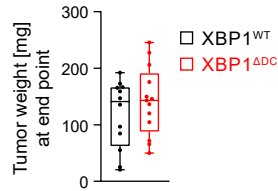

# Supplementary Figure 4

**A**

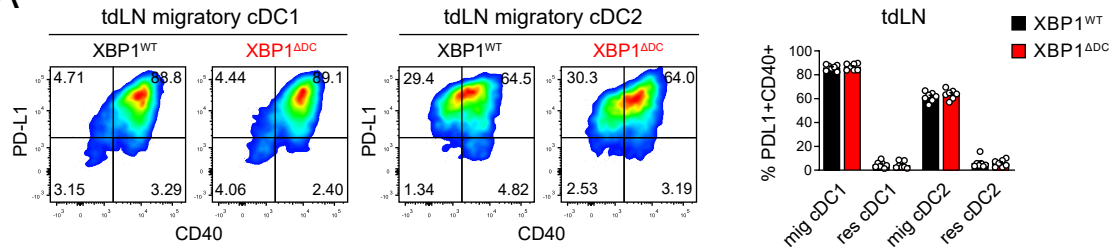

**B**

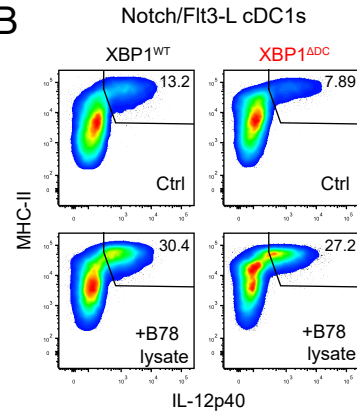

**C**

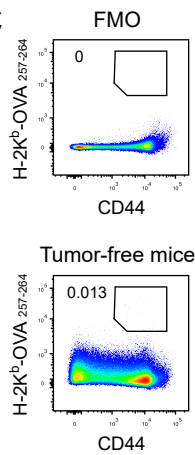

**D**

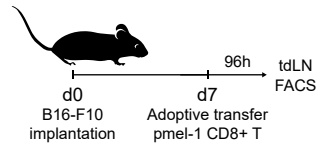

**E**

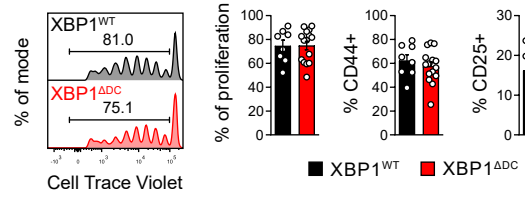

**F**

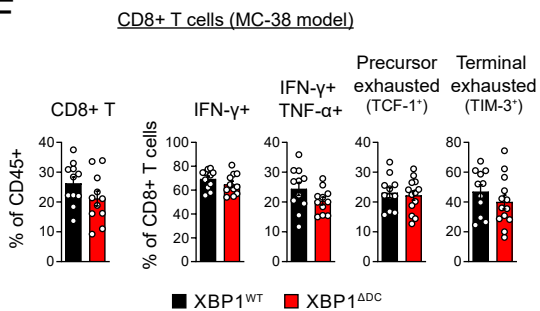

**G**

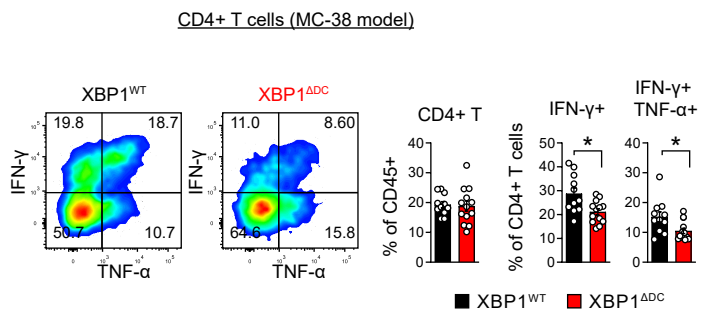

**H**

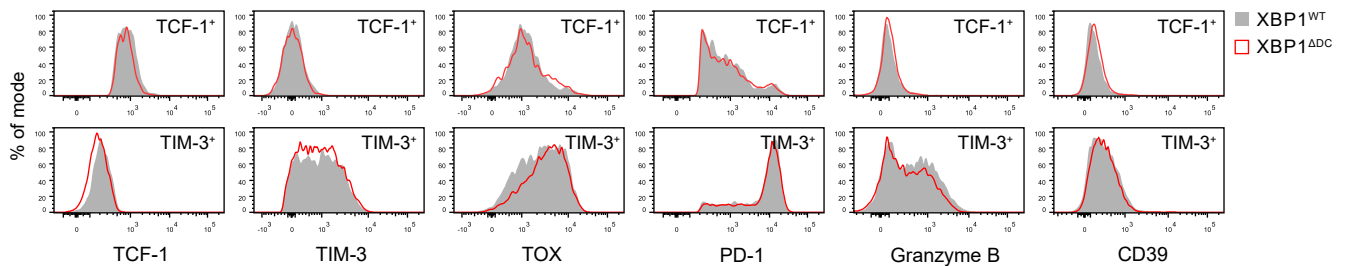

# Supplementary Figure 5

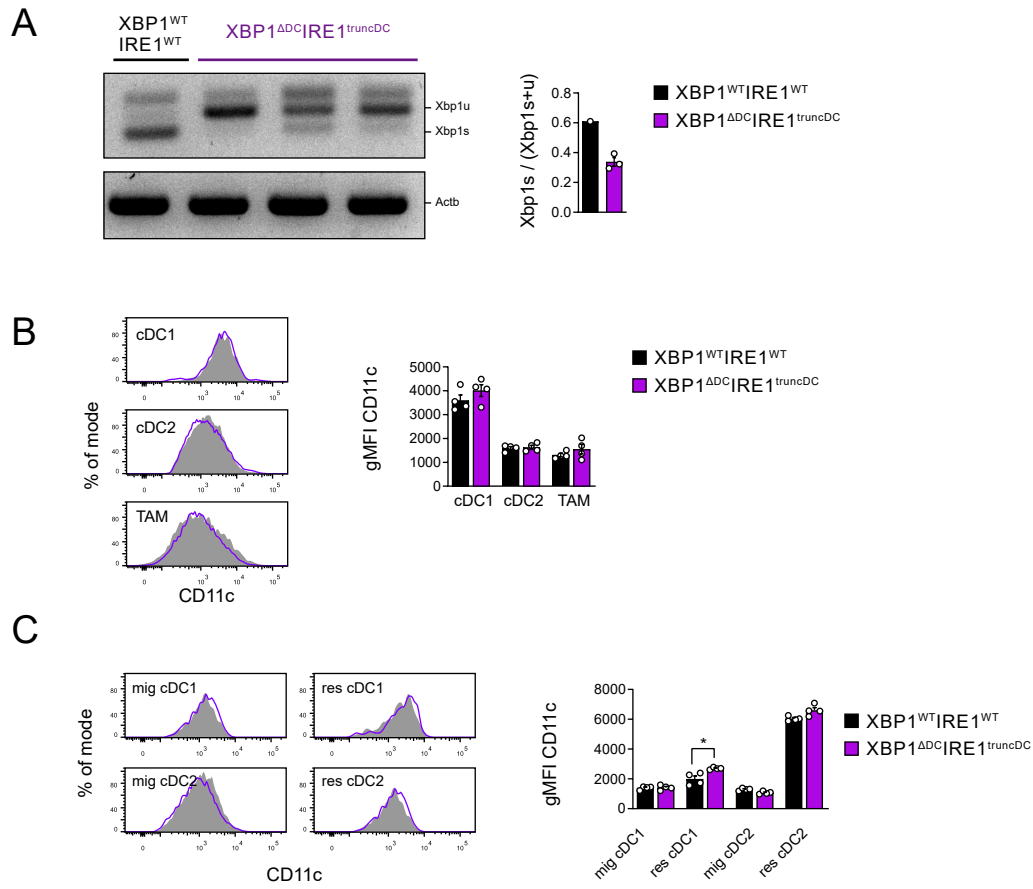

# Supplementary Figure 6

A

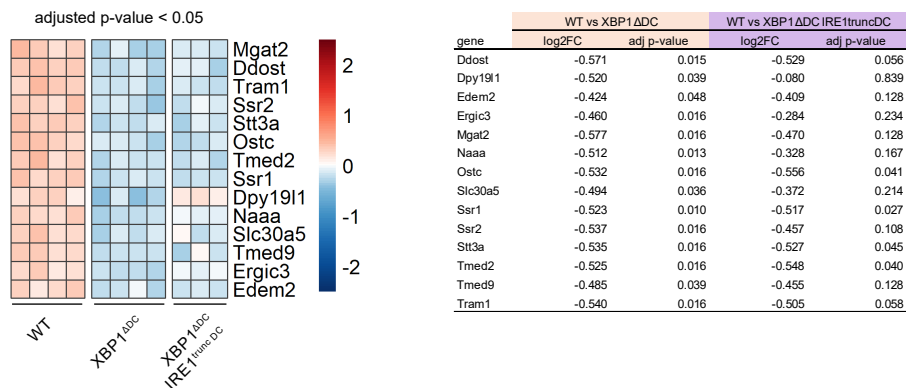

B

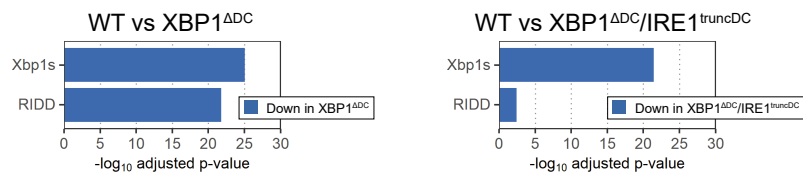

C

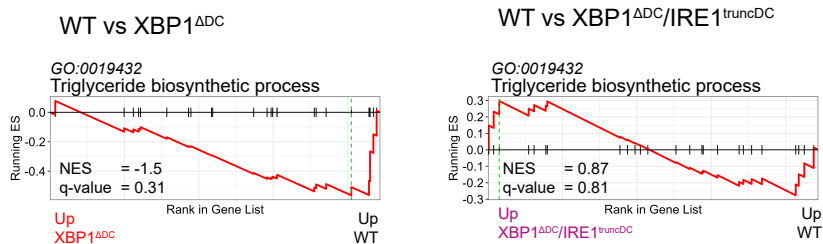

D

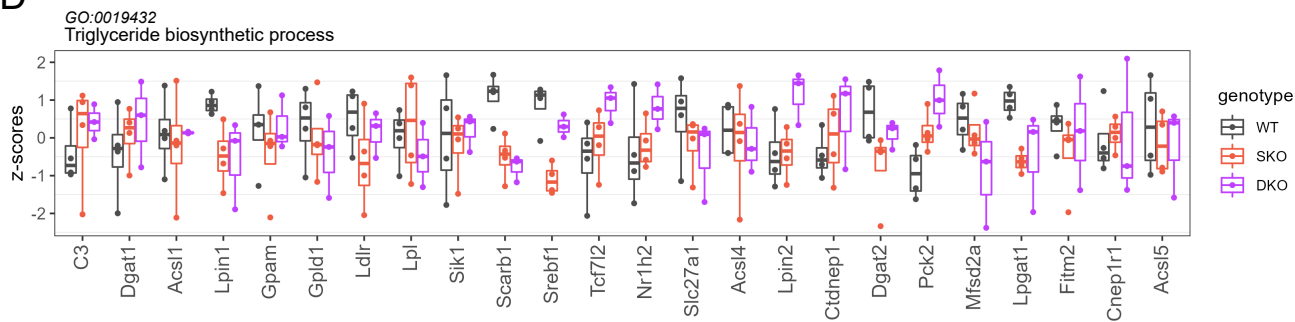

Supplement: Supplementary file [file media-1.pdf]
